Autophagy control and SERCA2b interaction of PERP

1     **ER stress-linked autophagy stabilizes apoptosis effector PERP**  
2     **and triggers its co-localization with SERCA2b at ER-plasma**  
3     **membrane junctions**

4             Running title: Autophagy control and SERCA2b interaction of PERP

5     Samantha J. McDonnell<sup>1</sup>, David G. Spiller<sup>2</sup>, Michael R. H. White<sup>3</sup>, Ian A. Prior<sup>4</sup>, Luminita  
6                                             Paraoan<sup>1,\*</sup>

7     <sup>1</sup>Department of Eye and Vision Science, Institute of Ageing and Chronic Disease, University  
8     of Liverpool, Liverpool, L7 8TX, United Kingdom.

9     <sup>2</sup>Systems Microscopy Centre, Faculty of Biology, Medicine and Health, University of  
10    Manchester, Manchester, M13 9PT, United Kingdom.

11    <sup>3</sup>School of Biological Sciences, Faculty of Biology, Medicine and Health, University of  
12    Manchester, Manchester, M13 9PT, United Kingdom.

13    <sup>4</sup>Department of Cellular and Molecular Physiology, Institute of Translational Medicine,  
14    University of Liverpool, Liverpool, L69 3BX, United Kingdom.

15

16    \*Corresponding author: Luminita Paraoan, PhD

17    Department of Eye and Vision Science, Institute of Ageing and Chronic Disease, University  
18    of Liverpool, William Henry Duncan Building, 6 West Derby Street, Liverpool, L7 8TX,  
19    United Kingdom. Tel: +44 151 794 9038. E-mail: lparaoan@liverpool.ac.uk

## Autophagy control and SERCA2b interaction of PERP

### 20 **Abstract**

21

22 Specific molecular interactions that underpin the switch between ER stress-triggered  
23 autophagy-mediated cellular repair and cellular death by apoptosis are not characterized.

24 This study reports the unexpected interaction elicited by ER stress between the plasma  
25 membrane (PM)-localized apoptosis effector PERP and the ER Ca<sup>2+</sup> pump SERCA2b. We

26 show that the p53 effector PERP, which specifically induces apoptosis when expressed  
27 above a threshold level, has a heterogeneous distribution across the PM of un-stressed cells

28 and is actively turned over by the lysosome. PERP is upregulated following sustained  
29 starvation-induced autophagy, which precedes the onset of apoptosis indicating that PERP

30 protein levels are controlled by a lysosomal pathway that is sensitive to cellular  
31 physiological state. Furthermore, ER stress stabilizes PERP at the PM and induces its

32 increasing co-localization with SERCA2b at ER-PM junctions. The findings highlight a novel  
33 crosstalk between pro-survival autophagy and pro-death apoptosis pathways and identify,

34 for the first time, accumulation of an apoptosis effector to ER-PM junctions in response to  
35 ER stress.

36

## Autophagy control and SERCA2b interaction of PERP

### 37 **Introduction**

38 The p53 apoptosis effector related to PMP-22 (PERP) is a tetraspan plasma membrane (PM)  
39 protein that is involved in cell-cell adhesion and the regulation of apoptosis in many cell  
40 types.<sup>1-3</sup> PERP transcription is tightly controlled by both p53 and p63 and is specifically  
41 induced during p53-mediated apoptosis.<sup>1,4</sup> Expression of PERP above a threshold level  
42 correlates with the activation and stabilization of its regulator p53 and the cleavage of both  
43 caspase 8 and Bid; thus PERP positively influences its own expression and mediates  
44 apoptosis engaging both the extrinsic and mitochondrial pathways.<sup>5,6</sup> PERP is therefore  
45 likely to be a key molecule that drives damaged cells towards apoptosis.<sup>7</sup>

46 Protein synthesis and modification in the endoplasmic reticulum (ER) are highly  
47 dependent on a high luminal  $\text{Ca}^{2+}$  concentration. In addition, spatiotemporal  $\text{Ca}^{2+}$  signals,  
48 generated via release from the ER stores and influx from the extracellular space, regulate  
49 many cellular processes including autophagy and cell death.<sup>8</sup> Sarco/endoplasmic reticulum  
50 ATPase (SERCA) pumps regulate  $\text{Ca}^{2+}$  influx into the ER and are vital for the maintenance of  
51 intracellular  $\text{Ca}^{2+}$  homeostasis. The three SERCA genes (ATP2A1-3) undergo alternative  
52 splicing to generate a family of isoforms with tissue-specific expression.<sup>9,10</sup> SERCA2 is  
53 expressed ubiquitously and is recruited to points of contact between the ER and PM  
54 involved in the fundamental store operated calcium entry (SOCE) influx mechanism, where  
55 it ensures efficient ER  $\text{Ca}^{2+}$  refilling following depletion.<sup>10,11</sup>

56 Disruption to ER  $\text{Ca}^{2+}$ , redox and ATP homeostasis results in impaired protein folding  
57 and the accumulation of proteins in the ER.<sup>12</sup> Cell repair is promoted by ER stress signalling  
58 pathways which alleviate the damage by inhibiting protein translation, upregulating protein  
59 folding and inducing protein degradation.<sup>13</sup> In addition, increased expression of SERCA

## Autophagy control and SERCA2b interaction of PERP

60 enhances ER  $\text{Ca}^{2+}$  loading in response to both  $\text{Ca}^{2+}$  depletion from the ER and  $\text{Ca}^{2+}$ -  
61 independent ER stress stimuli.<sup>14-16</sup> Multiple ER stress effectors also rapidly induce  
62 autophagy, which degrades protein aggregates and damaged organelles to aid cell  
63 survival.<sup>17,18</sup>

64 In the event of irreparable or prolonged damage, both the ER stress and autophagy  
65 pathways interact with those of apoptosis and cell fate is determined by the most dominant  
66 response.<sup>19</sup> In addition, ER  $\text{Ca}^{2+}$  signalling at regions in close contact with mitochondria has a  
67 fundamental role in the regulation of cell fate; high levels of  $\text{Ca}^{2+}$  transfer results in the loss  
68 of mitochondrial integrity, thereby promoting caspase-dependent apoptosis.<sup>20,21</sup> Toxic levels  
69 of intracellular  $\text{Ca}^{2+}$  are provided by the action of ER and PM pumps/channels.<sup>22-24</sup> For  
70 example, altered SERCA activity mediates apoptosis via ER-mitochondrial  $\text{Ca}^{2+}$  transfer.<sup>25-28</sup>

71 This study was initiated by the characterization by mass spectrometry of the protein-  
72 protein interactions of PERP required for apoptosis induction. We discovered that PERP is  
73 stabilized at the PM due to a reduction in its lysosomal uptake and degradation during ER  
74 stress-induced autophagy. Subsequently there is an increased co-localization with the ER  
75  $\text{Ca}^{2+}$  transporter SERCA2b that correlates with apoptosis induction. The findings thus  
76 identified a crosstalk between autophagy and apoptosis pathways with a role in the  $\text{Ca}^{2+}$ -  
77 mediated regulation of cell fate at ER-PM junctions.

78

## Autophagy control and SERCA2b interaction of PERP

### 79 **Materials and Methods**

#### 80 **Cell culture**

81 Authenticated Mel202 cells were purchased from Public Health England (lot number  
82 13H016) and were cultured in RPMI 1640 with 2mM L-glutamine and 25 mM HEPES (Gibco,  
83 Life Technologies, Paisley, UK) supplemented with 10% FCS (Sigma-Aldrich, Dorset, UK), 1  
84 mM sodium pyruvate and 1% non-essential amino acids (Sigma-Aldrich). HCT116 and  
85 HCT116 p53<sup>-/-</sup> cells (obtained from Johns Hopkins University GCRF Core Cell Center,  
86 Baltimore, USA; HCT116 p53<sup>+/+</sup> (parent of p53 KO), lot 40-16; HCT116 p53<sup>-/-</sup>, lot 379.2)  
87 were grown in Modified McCoy's 5a medium (Gibco) supplemented with 10% FCS. HeLa  
88 cells (original lot purchased from ATCC, catalogue number ATCC CCL-2) stably expressing  
89 Venus-PERP from a bacterial artificial chromosome (HeLa BAC Venus-PERP cells, Raheela  
90 Awais, personal communication) were cultured in Eagle's Minimum Essential Medium  
91 (ATCC, Middlesex, UK) supplemented with 10% FCS and 0.8 mg/ml geneticin (Sigma-Aldrich).  
92 All cells were cultured at 37°C and 5% CO<sub>2</sub> in humidified incubators and were free of  
93 mycoplasma contamination.

94

#### 95 **Expression vectors**

96 GFP-PERP, eGFP-SERCA2b and mCherry-SERCA2b were described previously.<sup>6,11</sup> To generate  
97 the Halo-PERP construct, PERP cDNA was amplified by PCR from the GFP-PERP vector using  
98 primers designed to add flanking EcoRI and NotI restriction sites to the 5' and 3' regions  
99 respectively, for subsequent incorporation into the pHTN HaloTag vector (Promega,  
100 Southampton, UK). The primer sequences were: forward primer (5'-

## Autophagy control and SERCA2b interaction of PERP

101 AATTAGAATTCATGATCCGCTGCGGCCTG-3') and reverse primer (5'-  
102 AATTAGCGGCCGCTTAGGCAGATGTGTAGAAGTACCTGGG-3'), with restriction sites shown in  
103 bold and stop codon underlined. PCR amplification was performed using the Phusion High-  
104 Fidelity PCR Kit (New England Biolabs Inc, Ipswich, UK) and the final reaction contained 250  
105 ng of template DNA, 0.5  $\mu$ M forward and reverse primers, 200  $\mu$ M dNTPs, 1X HF buffer and  
106 1 unit of T4 DNA polymerase. Cycling conditions used were 1 cycle of 98°C for 30 seconds,  
107 followed by 30 cycles of 98°C for 10 seconds, 63°C for 30 seconds and 72°C for 30 seconds,  
108 terminated with one cycle of 72°C for 7 minutes.

109 Amplified DNA was purified using the QIAquick PCR Purification Kit (Qiagen Ltd,  
110 Manchester, UK) and both the PERP sequence and HaloTag vector were digested using EcoRI  
111 and NotI (Roche, West Sussex, UK). Ligation was performed using 1 unit of T4 DNA ligase, 1X  
112 ligation buffer, 80 ng of backbone DNA and 35 ng of insert DNA. The resulting vector was  
113 used to transform DH5 $\alpha$  *E. coli* (Invitrogen, Paisley, UK), selected using ampicillin (100  
114  $\mu$ g/ml) and purified using the Qiagen EndoFree Plasmid Maxi Kit. The sequence of HaloTag-  
115 PERP (Halo-PERP) was confirmed by DNA sequencing, performed by DNA Sequencing &  
116 Services (School of Life Sciences, University of Dundee, Scotland) on an Applied Biosystems  
117 model 3730 automated capillary DNA sequencer.

118

### 119 **Cell transfection and treatment**

120 Mel202 cells were transiently transfected with Halo-PERP, mCherry-SERCA2b and control  
121 vectors. Cells were seeded at a density of  $4 \times 10^5$  cells/well in 6 well plates and the following  
122 day were transfected with 1  $\mu$ g of plasmid DNA and 2  $\mu$ l of TurboFect *in vitro* transfection  
123 reagent (Thermo Scientific, Paisley, UK). For live cell imaging,  $3 \times 10^5$  HeLa BAC Venus-PERP

## Autophagy control and SERCA2b interaction of PERP

124 cells were seeded in 35 mm glass bottom dishes (Greiner Bio-One, Stonehouse, UK) and  
125 transfected with 1 µg of mCherry-SERCA2b using 2 µl of TurboFect. For HaloTag pull-down,  
126  $2.5 \times 10^6$  cells were seeded in 100 mm dishes (4 dishes per transfection) and transfected  
127 using 5 µg plasmid DNA and 10 µl of TurboFect. Cells were treated with 1 µg/ml BFA, 20 µM  
128 MG132, 100 µM chloroquine, or 1, 10 and 100 nM bafilomycin A1 (all from Sigma-Aldrich).

129

### 130 **HaloTag protein pull-down**

131 PERP protein-protein interactions were isolated using the HaloTag Mammalian Pull-Down  
132 System (Promega) and standard protocol. Briefly,  $1 \times 10^7$  Mel202 cells were transfected with  
133 either HaloTag or Halo-PERP plasmids and cell lysates were collected 24 h post-transfection.  
134 A total of 2 mg of each protein lysate was incubated with pre-washed HaloLink resin at 4°C  
135 overnight. The resin was washed 5 times using TBS with 0.05% IGEPAL CA-360 (Sigma-  
136 Aldrich) and PERP plus any interacting proteins were cleaved from the resin using 30 units of  
137 ProTEV enzyme (Promega) at room temperature for one hour (elution 1). Following removal  
138 of the protein-containing supernatant, the resin was heated to 95°C for 5 minutes in SDS  
139 sample buffer (elution 2). Proteins in both elutions were identified by mass spectrometry  
140 and independently confirmed by Western blot.

141

### 142 **Immunoprecipitation**

143 SERCA2 was immunoprecipitated using the Dynabeads Protein A Immunoprecipitation Kit  
144 (Invitrogen) and monoclonal SERCA2 antibody (1:100, ab2861 Abcam, Cambridge, UK). Cells  
145 were scraped in dPBS, pelleted and frozen to -80°C. The resulting pellet was lysed in

## Autophagy control and SERCA2b interaction of PERP

146 Mammalian Lysis Buffer with Protease Inhibitor Cocktail (both from Promega) and 1.5 mg of  
147 protein was incubated with the bead-antibody conjugate for 30 minutes at room  
148 temperature. Antibody-protein complexes were washed 4 times in PBS and proteins were  
149 removed in SDS sample buffer for Western blot analysis.

150

### 151 **In-gel digestion and mass spectrometry**

152 For mass spectrometry analysis, proteins were separated on NuPAGE 4-12% Bis-Tris  
153 gradient gels (Invitrogen) and each lane was cut into three slices. Samples were reduced in  
154 10 mM dithiothreitol at 56°C, followed by alkylation using 50 mM iodoacetamide at room  
155 temperature for 30 minutes. Proteins were digested using 0.08 µg Trypsin Gold (Promega)  
156 per gel slice at 37°C for 16 h and peptides were extracted from the band pieces using  
157 acetonitrile, dried in a SpeedVac and re-suspended in 1% formic acid.

158 A total of 5 µl of peptides were separated on a nanoACQUITY UPLC system (Waters,  
159 Herts, UK), followed by a LTQ Orbitrap XL mass spectrometer (Thermo Scientific) with a  
160 Proxeon nanoelectrospray source. Peptides were passed through a 5 cm x 180 µm BEH-C18  
161 symmetry trapping column, followed by a 25 cm x 75 µm BEH-C18 column (both from  
162 Waters) at a flow rate of 400 nl/min for 39 minutes. The mass spectrometer acquired full  
163 scan MS spectra (m/z 300-2000, resolution 30 000) and the five most abundant ions were  
164 further fragmented for MS/MS analysis in the LTQ. A blank of 1% formic acid was ran  
165 between each sample. Raw mass spectrometry files were analysed using Maxquant  
166 proteomics software (version 1.5.3.30) and proteins were identified using the whole  
167 HumanIPI database (June 2016).



## Autophagy control and SERCA2b interaction of PERP

168

### 169 **Super resolution live cell microscopy**

170 Super resolution imaging was performed using a Zeiss LSM 880 Axio Observer microscope  
171 with Airyscan detection system in SR mode using a Plan-Apochromat 63x/1.4 Oil DIC M27  
172 objective (Carl Zeiss, Jena, Germany). Excitation was achieved using the 488nm line from an  
173 argon laser and a 561nm diode laser or 594nm HeNe laser and emitted light was collected  
174 through appropriate filters to eliminate any spill-over. Raw images were immediately  
175 Airyscan processed using the default settings and analysed using ZEN 2.1 software.

176

### 177 **Fluorescent microscopy**

178 Halo-PERP was labelled with the TMRDirect HaloTag ligand and 24 h post-transfection cells  
179 were imaged using a Zeiss Axio Observer Z1 live cell microscope with Apotome.2 system and  
180 a 40x/1.3 Oil DIC objective (Carl Zeiss).

181

### 182 **Western blotting and antibodies**

183 Cells were harvested following transfection or treatment at specific time points in lysis  
184 buffer (0.128 M  $\beta$ -mercaptoethanol, 40 mM tris, 10% glycerol, 1% SDS and 0.01%  
185 bromophenol blue) containing PhosSTOP phosphatase and Complete protease inhibitor  
186 cocktails (both from Roche). Proteins were separated by SDS-PAGE on a 10% polyacrylamide  
187 gel, transferred to nitrocellulose membrane and probed with the primary antibody at 4°C  
188 overnight. Antibodies for PERP (ab5986), SERCA2b isoform specific (ab137020) and GAPDH  
189 (ab8245) were purchased from Abcam and antibodies for LC3B (#3868) and p62 (#8025)  
190 were from Cell Signalling Technology (Leiden, The Netherlands). Anti-HaloTag (G9211) was

## Autophagy control and SERCA2b interaction of PERP

191 from Promega and anti-p53 (P6874) was from Sigma-Aldrich. Immunocomplexes were  
192 incubated with the appropriate horseradish peroxidase-conjugated secondary antibody and  
193 detected using SuperSignal West Pico Chemiluminescent Substrate (Thermo Scientific) or  
194 Radiance Plus Chemiluminescent Substrate (Cambridge Bioscience, Cambridge, UK) and a  
195 Bio-Rad Chemidoc Imaging System. Membranes were incubated in stripping solution at 55°C  
196 for 25 minutes and sequentially re-probed.

197

## 198 **RNA extraction, reverse transcription and RT-PCR**

199 RNA was extracted using an RNeasy Mini Kit (Qiagen) and converted to cDNA using the First  
200 Strand cDNA Synthesis Kit (Thermo Scientific). Real-time quantitative PCR was performed  
201 for both PERP and GAPDH using the primers and protocol described previously.<sup>29</sup> Primers  
202 were designed to specifically amplify the full length SERCA2 transcript (SERCA2b) at an  
203 annealing temperature of 60°C (forward primer 5'-TCGAACCCTTGCCACTCATC-3' and reverse  
204 primer 5'-GCACAAACGGCCAGGAAATC-3', synthesised by Eurogentec, Southampton, UK).

205

## 206 **Flow cytometry apoptosis detection**

207 Floating and attached cells were collected and incubated with Alexa Fluor 647 annexin V  
208 Ready Flow Conjugate (Thermo Scientific) for 15 minutes and 10 000 cells were analysed  
209 using a BD Accuri C6 flow cytometer.

210

## Autophagy control and SERCA2b interaction of PERP

### 211 **Statistical analysis**

212 The data presented represents the mean  $\pm$  SEM of at least three independent biological  
213 experiments. Data from each biological replicate was assessed for variance within the  
214 respective group and only data with similar variance between groups was included in the  
215 statistical analysis. One-way ANOVA with Dunnett's post hoc test, two-way ANOVA with  
216 Bonferroni post hoc test, or Student's t-test were used where appropriate to compare data  
217 to the control group. \* $p < 0.05$ , \*\* $p < 0.01$ , \*\*\* $p < 0.001$ , \*\*\*\* $p < 0.0001$ .

218

### 219 **Results**

#### 220 **Identification of PERP - SERCA2b interaction and co-localization**

221 To identify novel effectors involved in PERP-mediated apoptosis we investigated the  
222 protein-protein interactions of PERP using the HaloTag Mammalian Pull-Down System. A  
223 construct containing PERP cDNA fused to an N-terminal HaloTag was generated and  
224 expressed in the human uveal melanoma cell line Mel202 where the fusion protein localized  
225 to the PM and secretory pathway (Fig. S1 A), as previously characterised.<sup>6</sup> Expression of  
226 Halo-PERP for 48 h significantly increased the protein levels of endogenous PERP and p53  
227 and induced phosphatidylserine externalisation (Fig. S1 B and C), in line with previous  
228 results showing that Halo-PERP functions in both p53 stabilization and apoptosis induction.<sup>5</sup>  
229 This data validated the HaloTag system as a suitable platform for characterisation of the  
230 PERP protein interactome.

231 Halo-PERP protein pull-down and subsequent mass spectrometry analysis identified  
232 21 proteins with a fold change of 1.5 or higher in at least two independent experiments and

## Autophagy control and SERCA2b interaction of PERP

233 6 proteins were identified exclusively in Halo-PERP pull-downs in all three experiments.  
234 Interestingly, 3 ER membrane proteins were repeatedly identified in Halo-PERP pull-downs  
235 and were absent from all controls. Of these, we chose to focus on SERCA2 (Fig. 1 A). The  
236 SERCA2 gene has three isoforms, SERCA2a-c, which differ in their C-terminal region and  
237 tissue-specific expression. SERCA2b is the house-keeping isoform which has the highest  
238 affinity for  $\text{Ca}^{2+}$  and is expressed in all tissues.<sup>10</sup> As the peptide identified by mass  
239 spectrometry could not distinguish between the three isoforms, the specific interaction  
240 between PERP and SERCA2b was confirmed after HaloTag pull-down by Western blot using  
241 the isoform specific antibody (Fig. 1 B).

242 To further validate the interaction between PERP and SERCA2, HaloTag and Halo-PERP  
243 were expressed in Mel202 cells and SERCA2 interacting proteins were isolated by  
244 immunoprecipitation (IP). The specific isolation of Halo-PERP was confirmed by Western  
245 blot using a HaloTag antibody (Fig. 1 C). Together these data identified and validated a  
246 consistent interaction between PERP and the ER  $\text{Ca}^{2+}$  pump SERCA2b (Fig. 1 D).

247 We next aimed to characterise the localization of the PERP-SERCA2b interaction. To  
248 this end, mCherry-SERCA2b was co-expressed in HeLa BAC Venus-PERP cells, which stably  
249 express Venus-PERP at physiological levels (Fig. 1 E). Venus-PERP localized to the PM and  
250 secretory pathway and mCherry-SERCA2b localized broadly across the ER including the  
251 cortical ER, which lies adjacent to the PM. Notably, PERP was present in regions of the PM in  
252 close co-localization with the SERCA2b-containing ER (shown by arrows).

253 The findings highlighted a novel interaction between the apoptosis effector protein  
254 PERP and the ER  $\text{Ca}^{2+}$  pump SERCA2b, which likely occurs at ER-PM points of contact.

## Autophagy control and SERCA2b interaction of PERP

255

### 256 **PERP protein is upregulated during ER stress independent of p53 transcriptional** 257 **regulation**

258 Since SERCA2b is known to be induced in response to ER stress<sup>14</sup> and we have revealed an  
259 interaction between PERP and SERCA2b, we next explored the possibility that PERP may also  
260 respond to ER stress. Brefeldin A (BFA) prevents the export of proteins from the Golgi  
261 apparatus, leading to the accumulation of proteins in the ER and activating ER stress  
262 response pathways. Prolonged exposure to BFA induces caspase-dependent apoptosis.<sup>30</sup>  
263 During conditions of ER stress, cells selectively transcribe genes with regulatory ER stress  
264 response elements in their promoters, including SERCA2b.<sup>14</sup> BFA significantly increased the  
265 relative levels of SERCA2b mRNA from 2 h post-treatment (Fig. 2 A), followed by an increase  
266 in SERCA2b protein levels from 8 h post-treatment (Fig. 2 B).

267 HCT116 cells were used to study the response of endogenous PERP to BFA-induced ER  
268 stress and treatment with BFA for 8, 16, 24 and 48 h significantly increased the protein  
269 levels of PERP (Fig. 2 C). We next wanted to determine whether the increase in PERP during  
270 ER stress was due to an increase in transcription. HCT116 cells were treated with BFA and  
271 PERP mRNA levels were measured by RT-PCR over time. BFA-induced ER stress led to no  
272 significant increase in the mRNA levels of PERP, which actually significantly decreased at 16  
273 h post-treatment (Fig. 2 D). These findings were also consistent with those obtained in  
274 Mel202 cells (data not shown).

275 HCT116 p53<sup>-/-</sup> cells have significant deletions in exons 1-3 of the p53 gene and  
276 produce p53 protein that is defective in its ability to bind to DNA.<sup>31</sup> Similarly to wild type  
277 cells, HCT116 p53<sup>-/-</sup> cells upregulated PERP protein in response to prolonged ER stress (Fig.

## Autophagy control and SERCA2b interaction of PERP

278 2 E), with no significant changes to PERP mRNA levels (data not shown). This finding  
279 suggested that p53 activity is not required for PERP to respond during conditions of ER  
280 stress. Furthermore, analysis of the PERP promoter region found no currently characterised  
281 ER stress response element in the first 1000 bases before exon one. This supported our  
282 finding that PERP is not transcriptionally regulated during conditions of ER stress.

283 In summary, the data presented here showed that although SERCA2b expression  
284 increased by transcription during conditions of ER stress, PERP protein levels increased via  
285 post-translational regulation in a p53-independent manner.

286

### 287 **PERP accumulates at the PM in response to ER stress due to a reduction in its turnover**

288 PERP localization in response to ER stress was next assessed by super resolution live cell  
289 microscopy. Venus-PERP localized non-homogenously across the PM of non-treated cells  
290 and its levels were highest in regions of the membrane that formed contacts with  
291 neighbouring cells (Fig. 3 A). Treatment with BFA for 16 h induced the accumulation of  
292 Venus-PERP across the cell surface and within ER tubules, with the formation of ER vacuoles  
293 due to the prolonged induction of ER stress. The accumulation of ER-localized Venus-PERP  
294 was likely due to the BFA-induced inhibition of Golgi-PM trafficking and the retrograde  
295 transport of Golgi proteins into the ER. This finding confirmed that PERP reaches the PM via  
296 the classical secretory pathway.

297 The distribution of PERP at the PM during conditions of ER stress was analysed at the  
298 adherent base of the cell (Fig. 3 B). Venus-PERP localized to distinct PM islands in non-  
299 treated cells and significant areas of the membrane were PERP protein-free. In response to

## Autophagy control and SERCA2b interaction of PERP

300 BFA treatment, Venus-PERP displayed a more homogeneous distribution across the PM and  
301 formed intense puncta at the cell periphery (shown by arrows). Significantly, since BFA  
302 inhibits Golgi-PM trafficking, the accumulation of Venus-PERP at the PM was not due to the  
303 delivery of newly synthesised protein. Therefore, the increase in the PM levels of PERP  
304 under ER stress conditions was likely due to a reduction in its translocation from the PM and  
305 in its subsequent degradation.

306 Together these findings indicated that PERP accumulates at the PM during ER stress  
307 via an increase in its protein stability and a reduction in its turnover.

308

### 309 **PERP protein is actively degraded by the lysosome**

310 We therefore next characterised the stability and degradation of PERP protein. HCT116 cells  
311 were treated with the protein synthesis inhibitor cycloheximide (CHX) and the protein levels  
312 of PERP were detected over time (Fig. 4 A). p53, used as a positive control for protein  
313 synthesis inhibition, decreased from 2 h post-treatment due to its short half-life. The protein  
314 levels of PERP remained constant at 2 h post-CHX treatment followed by a significant  
315 decrease from 4 h post-treatment. Remarkably, PERP protein levels were reduced by 50%  
316 after 4 h of protein synthesis inhibition.

317 We also characterised the pathway that mediates the degradation of PERP protein.  
318 HCT116 cells were treated with the proteasome inhibitor MG132 or the lysosome inhibitor  
319 chloroquine (CQ) and cell lysates were collected for up to 24 h (Fig. 4 B). Inhibition of the  
320 proteasome degradation pathway led to no significant changes to PERP protein levels.  
321 However, PERP protein levels progressively increased from 2 h of lysosome inhibition, with a

## Autophagy control and SERCA2b interaction of PERP

322 significant increase from 8 h post-treatment. This suggested that PERP protein undergoes  
323 lysosomal degradation. The protein levels of p53 were used as a positive control for  
324 proteasome inhibition by MG132; p53 increased from 2 h post-MG132 treatment with a  
325 significant increase from 8 h post-treatment (Fig. 4 C). PERP lysosomal degradation was  
326 confirmed using a second lysosome inhibitor bafilomycin (Baf) and the protein levels of both  
327 PERP and the autophagy marker LC3II increased in a dose-dependent manner 24 h after  
328 treatment (Fig. 4 D).

329 Together this data showed that PERP protein is actively turned-over in healthy cells by  
330 a pathway requiring lysosomal function.

331

### 332 **Upregulation of PERP by sustained autophagy precedes apoptosis induction**

333 Multiple ER stress signalling pathways regulate autophagy and so we next characterised the  
334 response of autophagy markers LC3B and p62 to BFA (Fig. 5 A and B). BFA consistently  
335 increased the levels of LC3II from 2 h of ER stress induction and at 16, 24 and 48 h post-  
336 treatment LC3II increased beyond the dynamic range required for quantification compared  
337 to the non-treated sample. This confirmed that the number of autophagosomes  
338 progressively increased over time in response to BFA-induced ER stress.

339 The protein levels of the autophagy marker p62 were used for autophagy flux analysis.  
340 BFA decreased the levels of p62 at 2 and 8 h, followed by an increase until a peak level at 48  
341 h post-treatment. To determine whether the changes to LC3II and p62 protein levels in  
342 response to BFA were due to an increase in autophagy induction or an impairment in  
343 lysosomal degradation, HCT116 cells were pre-treated with Baf followed by BFA for the



## Autophagy control and SERCA2b interaction of PERP

344 indicated time points (Fig. 5 B). Normalised p62 levels increased beyond that of the BFA only  
345 treated cells at all time points tested, which suggested that the increase in LC3II and p62 in  
346 response to BFA was due to an increase in autophagy induction rather than lysosomal  
347 inhibition.

348 We next determined the effect of autophagy induction on the protein levels of PERP.  
349 Firstly, HCT116 cells were serum starved for 24 h and the protein levels of autophagy  
350 marker p62 and PERP were determined (Fig. 5 C); p62 was significantly decreased  
351 confirming autophagy induction as characterised in this cell type elsewhere.<sup>32</sup> In addition,  
352 PERP protein levels were significantly increased suggesting that PERP responds to autophagy  
353 induction.

354 We therefore next characterised the response of PERP to autophagy induction over  
355 time. HCT116 cells were serum starved for 2-48 h and the response of PERP was detected by  
356 immunoblotting. PERP protein levels remained constant for up to 4 h of serum starvation  
357 but significantly increased at 8, 24 and 48 h post-autophagy induction (Fig. 5 D). The  
358 sustained activation of autophagy promotes cell death and so the impact of serum  
359 starvation on apoptosis was determined over time by annexin V staining and flow  
360 cytometry; apoptosis was significantly induced from 24 h of serum starvation (Fig. 5 E).

361 Together our findings showed that during prolonged autophagy induction, such as  
362 that mediated by ER stress or serum starvation, PERP protein is upregulated before the  
363 switch to apoptosis induction.

364

## Autophagy control and SERCA2b interaction of PERP

### 365 **Increased SERCA2b leads to stabilization of PERP protein and induces apoptosis**

366 Increased levels of SERCA2 are known to induce caspase-dependent apoptosis due to ER  
367  $\text{Ca}^{2+}$  overload.<sup>25,26</sup> To determine whether PERP is involved in SERCA2b-mediated apoptosis,  
368 mCherry-SERCA2b was expressed in Mel202 cells and changes to PERP protein and mRNA  
369 levels were detected (Fig. 6 A and B). At 24 h post-transfection, mCherry-SERCA2b was  
370 expressed at low levels and no changes to the mRNA or protein levels of PERP were  
371 observed. However, at 48 and 72 h post-transfection, both endogenous SERCA2b and  
372 mCherry-SERCA2b were increased compared to the control cells and this correlated with a  
373 significant increase in the protein levels of PERP. Despite this, expression of mCherry-  
374 SERCA2b for up to 72 h had no effect on the mRNA levels of PERP (Fig. 6 B). This suggested  
375 that increased expression of SERCA2b stabilizes PERP protein.

376 The SERCA2b-mediated apoptosis in Mel202 cells was determined at both 24 and 48 h  
377 post-transfection by flow cytometry using annexin V (Fig. 6 C). At 24 h post-transfection with  
378 eGFP-SERCA2b there was no significant difference in the level of apoptosis compared to the  
379 eGFP expressing control cells. However, apoptosis was significantly induced at 48 h post-  
380 transfection with eGFP-SERCA2b. This showed that increased SERCA2b expression beyond  
381 the homeostatic threshold level at 48 h post-transfection mediated apoptosis. Furthermore,  
382 PERP was stabilized specifically during SERCA2b-mediated apoptosis.

383 Next, mCherry-SERCA2b was co-expressed in HeLa BAC Venus-PERP cells and images  
384 were taken at 24 and 48 h post-transfection (Fig. 6 D). At 24 h post-transfection the  
385 mCherry-SERCA2b-containing ER formed healthy tubules throughout the cell and  
386 subplasmalemmal region. However, at 48 h post-transfection mCherry-SERCA2b  
387 accumulated in intense puncta throughout the ER and cortical ER. Most notably, Venus-

## Autophagy control and SERCA2b interaction of PERP

388 PERP was present in the regions of the PM that co-localized with the mCherry-SERCA2b  
389 puncta (shown by arrows in Fig 6 D).

390 Together, this data indicated that PERP protein is stabilized in the presence of  
391 apoptosis-inducing levels of SERCA2b expression.

392

### 393 **PERP and SERCA2b accumulate at ER-PM junctions in response to ER stress**

394 Next, the effect of sustained ER stress on the interaction of PERP and SERCA2b was  
395 determined. HeLa BAC Venus-PERP cells co-expressing mCherry-SERCA2b were treated with  
396 BFA and images were taken 16 h post-treatment (Fig. 7 A). Imaging in the centre of the  
397 optical Z-stack of the cell showed co-distribution of Venus-PERP and mCherry-SERCA2b in  
398 the ER and vacuoles formed across the ER network. In addition, high levels of PERP across  
399 the cell surface were observed. Since the accumulation of PERP in the ER was potentially  
400 due to an indirect effect of the mechanism of BFA, the co-localization of Venus-PERP and  
401 mCherry-SERCA2b was determined at the base of the cell. Interestingly, mCherry-SERCA2b  
402 accumulated in intense puncta towards the PM in regions where Venus-PERP was also  
403 enriched (Fig. 7 B).

404 Taken together the findings indicate that during conditions of sustained ER stress,  
405 PERP accumulates at the PM due to a reduction in its lysosomal uptake and degradation,  
406 where it increasingly co-localizes with SERCA2b across ER-PM points of contact to mediate  
407 apoptosis.

408

## Autophagy control and SERCA2b interaction of PERP

### 409 **Discussion**

410 The protein levels of the p53-regulated PM protein PERP are maintained at a threshold level  
411 in healthy cells.<sup>6</sup> In this study, we showed that the threshold level of PERP protein is  
412 regulated through the action of a selective autophagy-lysosomal pathway. Therefore, PERP  
413 expression is precisely controlled by competing mechanisms that are sensitive to cellular  
414 state including, but not limited to, p53/p63-mediated transcription and autophagy-  
415 lysosomal protein degradation.

416 Using a cell-based model expressing physiological levels of PERP, we showed that  
417 PERP has a heterogeneous distribution across the PM of healthy cells with highest  
418 expression in regions of the PM that are engaged in cell-cell contacts. These areas are likely  
419 to be important for the cell adhesion function of PERP.<sup>3,33</sup> In addition, the identification of  
420 an interaction between PERP and the ER-PM junctional protein SERCA2b highlighted, for the  
421 first time, localization of PERP to regions of the PM that come in close contact with the ER.

422 Expression of PERP above a threshold level influences cell fate towards the death  
423 outcome.<sup>1,5-7</sup> Here, we showed that sustained autophagy, induced by both starvation and ER  
424 stress, increased PERP protein at the PM beyond the physiological threshold level and this  
425 correlated with apoptosis induction. Autophagy is also induced following *Salmonella*  
426 infection to aid pathogen clearance.<sup>34,35</sup> Recently it was shown that PERP accumulates at the  
427 apical PM in response to *Salmonella* infection due to alterations in its uptake and  
428 degradation.<sup>36</sup> We therefore propose that the upregulation of autophagy following infection  
429 promotes the stabilization of PERP at the PM.

## Autophagy control and SERCA2b interaction of PERP

430       Complex interactions between autophagy and apoptosis following cellular  
431 disturbances, such as ER stress, enable cells to dynamically regulate cell fate in a highly  
432 controlled manner.<sup>37</sup> Our findings suggest that PERP is involved in the autophagy/apoptosis  
433 crosstalk; PERP is selectively upregulated at the PM following high levels of autophagy  
434 (starvation, ER stress, inflammation) where it directly engages its apoptotic machinery. In  
435 this scenario, PERP is protective against chronic autophagy.

436       Signals transduced across membrane contact sites via the formation of protein  
437 complexes and the transfer of molecules, such as  $\text{Ca}^{2+}$ , regulate many cellular processes.<sup>38</sup>  
438 SERCA2b is recruited to ER-PM junctions involved in SOCE where it is key to establishing  $\text{Ca}^{2+}$   
439 homeostasis after oscillation.<sup>11</sup> PERP lacks a conserved death domain and its precise mode  
440 of apoptosis induction from the PM is not understood.<sup>7</sup> Here, we found that PERP is post-  
441 transcriptionally upregulated during SERCA2b-mediated apoptosis, conceivably through ER  
442 stress induced by dysregulation of luminal  $\text{Ca}^{2+}$  homeostasis.<sup>12,25</sup> In addition, PERP and  
443 SERCA2b increasingly co-localize during chronic ER stress. PERP is the first identified PM-  
444 localized interactor of SERCA2b and we therefore propose that this interaction promotes  
445 the stabilization of SERCA2b in the cortical ER for sustained  $\text{Ca}^{2+}$  signalling events.

446       SERCA modulates the sensitivity to apoptosis and its  $\text{Ca}^{2+}$  pumping activity is regulated  
447 by competing pro-apoptotic and anti-apoptotic pathways.<sup>39-42</sup> Apoptosis modulators, such  
448 as p53, activate SERCA2 to promote  $\text{Ca}^{2+}$ -dependent apoptosis.<sup>40</sup> Similarly, the PERP-  
449 SERCA2b interaction may mediate apoptosis by mitochondrial  $\text{Ca}^{2+}$  overload. This is  
450 supported by a study which showed that PERP induces apoptosis via an increase in  
451 mitochondrial membrane permeability and the release of cytochrome C in renal cells  
452 exposed to hypoxic injury.<sup>43</sup>

## Autophagy control and SERCA2b interaction of PERP

453 Our current findings provide the first mechanistic evidence of SERCA2 regulation and  
454 apoptosis induction at ER-PM junctions. The interaction of PERP and SERCA2b at junctions  
455 involved in SOCE may promote the sustained delivery of toxic levels of  $\text{Ca}^{2+}$  to the ER.  
456 However, PERP has a high sequence similarity with established  $\text{Ca}^{2+}$  channels and so it  
457 remains possible that PERP has  $\text{Ca}^{2+}$  conducting activity across the PM.<sup>1</sup> The interaction  
458 between PERP and SERCA2b would therefore directly deliver extracellular  $\text{Ca}^{2+}$  into the ER  
459 for apoptosis.

460 This study has identified a novel crosstalk between the ER stress, autophagy and  
461 apoptosis pathways and has highlighted, for the first time, a mechanism of apoptosis  
462 regulation at ER-PM junctions. PERP-mediated destabilization of ER  $\text{Ca}^{2+}$  metabolism is likely  
463 to further induce both ER stress and autophagy responses and therefore amplify the stress  
464 signal to sway cell fate towards apoptosis.

465

## 466 **Acknowledgements**

467 This work was supported by funding from the Humane Research Trust, UK and we are  
468 grateful to the laboratory of Javier García-Sancho for providing the SERCA2b constructs.

469

## 470 **Conflict of interest**

471 All authors declare no conflicts of interest.

472

## Autophagy control and SERCA2b interaction of PERP

### 473 **References**

- 474 1 Attardi, L. D. *et al.* PERP, an apoptosis-associated target of p53, is a novel member of  
475 the PMP-22/gas3 family. *Genes Dev.* **14**, 704-718 (2000).
- 476 2 Ihrie, R. A. *et al.* Perp is a mediator of p53-dependent apoptosis in diverse cell types.  
477 *Curr. Biol.* **13**, 1985-1990 (2003).
- 478 3 Ihrie, R. A. *et al.* Perp Is a p63-Regulated Gene Essential for Epithelial Integrity. *Cell*  
479 **120**, 843-856 (2005).
- 480 4 Flores, E. R. *et al.* p63 and p73 are required for p53-dependent apoptosis in response  
481 to DNA damage. *Nature* **416**, 560-564 (2002).
- 482 5 Davies, L., Spiller, D., White, M. R. H., Grierson, I. & Paraoan, L. PERP expression  
483 stabilizes active p53 via modulation of p53-MDM2 interaction in uveal melanoma  
484 cells. *Cell Death Dis.* **2**, e136 (2011).
- 485 6 Davies, L. *et al.* P53 apoptosis mediator PERP: localization, function and caspase  
486 activation in uveal melanoma. *J. Cell. Mol. Med.* **13**, 1995-2007 (2009).
- 487 7 Ihrie, R. A. & Attardi, L. D. Perp-etrating p53-Dependent Apoptosis. *Cell Cycle* **3**, 265-  
488 267 (2004).
- 489 8 Berridge, M. J., Bootman, M. D. & Roderick, H. L. Calcium signalling: dynamics,  
490 homeostasis and remodelling. *Nat. Rev. Mol. Cell Biol.* **4**, 517-529 (2003).
- 491 9 Vandecaetsbeek, I., Vangheluwe, P., Raeymaekers, L., Wuytack, F. & Vanoevelen, J.  
492 The Ca<sup>2+</sup> Pumps of the Endoplasmic Reticulum and Golgi Apparatus. *Cold Spring*  
493 *Harb. Perspect. Biol.* **3**, a004184 (2011).
- 494 10 Brini, M. & Carafoli, E. Calcium Pumps in Health and Disease. *Physiol. Rev.* **89**, 1341-  
495 1378 (2009).

## Autophagy control and SERCA2b interaction of PERP

- 496 11 Manjarres, I. M., Rodriguez-Garcia, A., Alonso, M. T. & Garcia-Sancho, J. The  
497 sarco/endoplasmic reticulum Ca<sup>2+</sup> ATPase (SERCA) is the third element in  
498 capacitative calcium entry. *Cell Calcium* **47**, 412-418 (2010).
- 499 12 Szegezdi, E., Logue, S. E., Gorman, A. M. & Samali, A. Mediators of endoplasmic  
500 reticulum stress-induced apoptosis. *EMBO reports* **7**, 880-885 (2006).
- 501 13 Rutkowski, D. T. & Kaufman, R. J. A trip to the ER: coping with stress. *Trends Cell Biol.*  
502 **14**, 20-28 (2004).
- 503 14 Caspersen, C., Pedersen, P. S. & Treiman, M. The Sarco/Endoplasmic Reticulum  
504 Calcium-ATPase 2b Is an Endoplasmic Reticulum Stress-inducible Protein. *J. Biol.*  
505 *Chem.* **275**, 22363-22372 (2000).
- 506 15 Højmann Larsen, A., Frandsen, A. & Treiman, M. Upregulation of the SERCA-type  
507 Ca<sup>2+</sup> pump activity in response to endoplasmic reticulum stress in PC12 cells. *BMC*  
508 *Biochem.* **2** (2001).
- 509 16 Kuo, T. H. *et al.* Co-ordinated regulation of the plasma membrane calcium pump and  
510 the sarco(endo)plasmic reticular calcium pump gene expression by Ca<sup>2+</sup>. *Cell*  
511 *Calcium* **21**, 399-408 (1997).
- 512 17 Yorimitsu, T., Nair, U., Yang, Z. & Klionsky, D. J. Endoplasmic Reticulum Stress  
513 Triggers Autophagy. *J. Biol. Chem.* **281**, 30299-30304 (2006).
- 514 18 Deegan, S., Saveljeva, S., Gorman, A. M. & Samali, A. Stress-induced self-cannibalism:  
515 on the regulation of autophagy by endoplasmic reticulum stress. *Cell. Mol. Life Sci.*  
516 **70**, 2425-2441 (2013).
- 517 19 Liu, Z., Lv, Y., Zhao, N., Guan, G. & Wang, J. Protein kinase R-like ER kinase and its  
518 role in endoplasmic reticulum stress-decided cell fate. *Cell Death Dis.* **6**, e1822  
519 (2015).



## Autophagy control and SERCA2b interaction of PERP

- 520 20 Rizzuto, R. *et al.* Close Contacts with the Endoplasmic Reticulum as Determinants of  
521 Mitochondrial Ca<sup>2+</sup> Responses. *Science* **280**, 1763-1766 (1998).
- 522 21 Pinton, P., Giorgi, C., Siviero, R., Zecchini, E. & Rizzuto, R. Calcium and apoptosis: ER-  
523 mitochondria Ca<sup>2+</sup> transfer in the control of apoptosis. *Oncogene* **27**, 6407-6418  
524 (2008).
- 525 22 Mendes, C. C. P. *et al.* The Type III Inositol 1,4,5-Trisphosphate Receptor  
526 Preferentially Transmits Apoptotic Ca<sup>2+</sup> Signals into Mitochondria. *J. Biol. Chem.*  
527 **280**, 40892-40900 (2005).
- 528 23 Flourakis, M. *et al.* Orai1 contributes to the establishment of an apoptosis-resistant  
529 phenotype in prostate cancer cells. *Cell Death Dis.* **1**, e75 (2010).
- 530 24 Marchi, S. *et al.* Mitochondrial and endoplasmic reticulum calcium homeostasis and  
531 cell death. *Cell Calcium* **69**, 62-72 (2017).
- 532 25 Ma, T. S., Mann, D. L., Lee, J. H. & Gallinghouse, G. J. SR compartment calcium and  
533 cell apoptosis in SERCA overexpression. *Cell Calcium* **26**, 25-36 (1999).
- 534 26 Chami, M. *et al.* Serca1 Truncated Proteins Unable to Pump Calcium Reduce the  
535 Endoplasmic Reticulum Calcium Concentration and Induce Apoptosis. *J. Cell Biol.*  
536 **153**, 1301-1314 (2001).
- 537 27 Chami, M. *et al.* Role of SERCA1 Truncated Isoform in the Proapoptotic Calcium  
538 Transfer from ER to Mitochondria during ER Stress. *Mol. Cell* **32**, 641-651 (2008).
- 539 28 Sehgal, P. *et al.* Inhibition of the sarco/endoplasmic reticulum (ER) Ca<sup>2+</sup>-ATPase by  
540 thapsigargin analogs induces cell death via ER Ca<sup>2+</sup> depletion and the unfolded  
541 protein response. *J. Biol. Chem.* **292**, 19656-19673 (2017).
- 542 29 Awais, R., Spiller, D. G., White, M. R. H. & Paraoan, L. p63 is required beside p53 for  
543 PERP-mediated apoptosis in uveal melanoma. *Br. J. Cancer* **115**, 983-992 (2016).

## Autophagy control and SERCA2b interaction of PERP

- 544 30 Miller, S. G., Carnell, L. & Moore, H. H. Post-Golgi membrane traffic: brefeldin A  
545 inhibits export from distal Golgi compartments to the cell surface but not recycling. *J.*  
546 *Cell Biol.* **118**, 267-283 (1992).
- 547 31 Bunz, F. *et al.* Requirement for p53 and p21 to sustain G2 arrest after DNA damage.  
548 *Science* **282**, 1497-1501 (1998).
- 549 32 Xinbing Sui, Y. F., Haizhou Lou, Kaifeng Wang, Yu Zheng, Fang Lou, Wei Jin, Yinghua  
550 Xu, Wei Chen, Hongming Pan, Xian Wang, Weidong Han. p53 suppresses stress-  
551 induced cellular senescence via regulation of autophagy under the deprivation of  
552 serum. *Mol. Med. Report.* **11**, 1214-1220 (2014).
- 553 33 Franke, W. *et al.* Transmembrane protein PERP is a component of tessellate  
554 junctions and of other junctional and non-junctional plasma membrane regions in  
555 diverse epithelial and epithelium-derived cells. *Cell Tissue Res.* **353**, 99-115 (2013).
- 556 34 Birmingham, C. L., Smith, A. C., Bakowski, M. A., Yoshimori, T. & Brumell, J. H.  
557 Autophagy Controls Salmonella Infection in Response to Damage to the Salmonella-  
558 containing Vacuole. *J. Biol. Chem.* **281**, 11374-11383 (2006).
- 559 35 Wang, L., Yan, J., Niu, H., Huang, R. & Wu, S. Autophagy and Ubiquitination in  
560 Salmonella Infection and the Related Inflammatory Responses. *Front Cell Infect*  
561 *Micobiol* **8**, 78 (2018).
- 562 36 Hallstrom, K. N. *et al.* PERP, a host tetraspanning membrane protein, is required for  
563 Salmonella-induced inflammation. *Cell. Microbiol.* **17**, 843-859 (2015).
- 564 37 Booth, L. A., Tavallai, S., Hamed, H. A., Cruickshanks, N. & Dent, P. The role of cell  
565 signalling in the crosstalk between autophagy and apoptosis. *Cell. Signal.* **26**, 549-  
566 555 (2014).

Autophagy control and SERCA2b interaction of PERP

- 567 38 Okeke, E., Dingsdale, H., Parker, T., Voronina, S. & Tepikin, A. V. Endoplasmic  
568 reticulum–plasma membrane junctions: structure, function and dynamics. *J. Physiol.*  
569 **594**, 2837-2847 (2016).
- 570 39 Chemaly, E. R., Troncone, L. & Lebecq, D. SERCA control of cell death and survival.  
571 *Cell Calcium* **69**, 46-61 (2018).
- 572 40 Giorgi, C. *et al.* p53 at the endoplasmic reticulum regulates apoptosis in a Ca<sup>2+</sup>-  
573 dependent manner. *Proc. Natl. Acad. Sci. U.S.A.* **112**, 1779-1784 (2015).
- 574 41 Hewarathna, A., Dremina, E. & Schöneich, C. Inhibition and conformational change  
575 of SERCA3b induced by Bcl-2. *Biochim. Biophys. Acta* **1865**, 121-131 (2017).
- 576 42 Pinton, P. *et al.* The Ca<sup>2+</sup> concentration of the endoplasmic reticulum is a key  
577 determinant of ceramide-induced apoptosis: significance for the molecular  
578 mechanism of Bcl-2 action. *EMBO J.* **20**, 2690-2701 (2001).
- 579 43 Singaravelu, K., Devalaraja-Narashimha, K., Lastovica, B. & Padanilam, B. J. PERP, a  
580 p53 proapoptotic target, mediates apoptotic cell death in renal ischemia. *Am. J.*  
581 *Renal Physiol.* **296**, F847-F858 (2009).
- 582
- 583

## Autophagy control and SERCA2b interaction of PERP

### 584 **Figure Legends**

585 **Figure 1. PERP interacts with SERCA2b at ER-PM junctions. (A)** Protein interacting partners  
586 of Halo-PERP were isolated from Mel202 cells using the HaloTag Mammalian Pull-Down  
587 System and identified by mass spectrometry. Maxquant intensity values for SERCA2 and  
588 PERP in three independent experiments are shown. **(B)** The interaction of PERP and  
589 SERCA2b was confirmed in two independent HaloTag pull-down experiments by  
590 immunoblotting as described in the Methods (proteins eluted from the resin by TEV  
591 enzymatic cleavage followed by a successive SDS-based elution). Figure shows two different  
592 exposures of SERCA2b panel to allow visualisation of lower intensity bands). **(C)** PERP-  
593 SERCA2 complex formation was validated by SERCA2 IP in Mel202 cells expressing HaloTag  
594 or Halo-PERP using a HaloTag antibody. **(D)** Diagram of SERCA2a-c proteins, indicating the  
595 relative positions of the peptide identified by mass spectrometry (black) and the antibody  
596 immunogen sites (grey) used for validation of the SERCA2b-PERP interaction. Antibody 1  
597 was used in HaloTag pull down validation **(B)** and antibody 2 was used for IP of SERCA2 **(C)**.  
598 **(E)** Super resolution images of HeLa BAC Venus-PERP cells co-expressing mCherry-SERCA2b,  
599 junctions between the ER and PM shown by arrows. Scale bar 20  $\mu\text{m}$  in full image and 5  $\mu\text{m}$   
600 in zoom panel.

601

602 **Figure 2. PERP protein is stabilized by ER stress, independent of p53 transcriptional**  
603 **regulation.** HCT116 cells were treated with 1  $\mu\text{g/ml}$  BFA for the indicated time points and  
604 changes to the levels of **(A)** SERCA2b mRNA (n=4, one-way ANOVA, F=3.442, p=0.0239\*), **(B)**  
605 SERCA2b protein (n=7), **(C)** PERP protein (n=7, one-way ANOVA, F= 3.025, p= 0.0329\*) and  
606 **(D)** PERP mRNA (n=4, one-way ANOVA, F=5.297, p=0.0036\*\*) were detected by RT-PCR or

## Autophagy control and SERCA2b interaction of PERP

607 Western blot and normalised to the level of GAPDH. **(E)** HCT116 p53<sup>-/-</sup> cells were treated  
608 with 1 µg/ml BFA and the response of PERP protein levels was detected by immunoblotting.

609

610 Figure 3. **PERP accumulates at plasma membrane puncta during ER stress. (A and B)** Super  
611 resolution images of HeLa BAC Venus-PERP cells at the **(A)** z-stack centre and **(B)** base of the  
612 cell, either non-treated (NT) or BFA-treated (16 h). Scale bars 20 µm.

613

614 Figure 4. **PERP protein is actively degraded by the lysosome. (A)** HCT116 cells were treated  
615 with 30 µg/ml CHX for the indicated time points and the protein levels of PERP and p53  
616 were detected by immunoblotting. Histogram shows PERP protein levels normalised to  
617 GAPDH. One-way ANOVA, n=3, F=12.63, p=0.0003\*\*\*. **(B)** HCT116 cells were treated with  
618 20 µM MG132 or 100 µM CQ for the indicated time points and PERP protein levels were  
619 detected by Western blot. Graph represents PERP protein levels normalised to GAPDH. One-  
620 way ANOVA, n=3, MG132 PERP: F=0.8849, p=0.5204 ns; CQ PERP: F=13.03, p=0.0002\*\*\*. **(C)**  
621 HCT116 cells were treated with 20 µM MG132 and the protein levels of p53 were detected  
622 by immunoblotting and normalised to the level of GAPDH. One-way ANOVA, n=3, F=11.58,  
623 p=0.0003\*\*\*. **(D)** HCT116 cells were treated with 1, 10 and 100 nM of bafilomycin (Baf) and  
624 the protein levels of LC3B and PERP were detected 24 h post-treatment by immunoblotting.

625

626 Figure 5. **PERP is selectively upregulated in response to sustained autophagy induction,**  
627 **correlating with apoptosis. (A)** Protein levels of autophagy marker LC3B in HCT116 cells  
628 treated with 1 µg/ml BFA. **(B)** Autophagy flux analysis of p62 levels in HCT116 cells treated

## Autophagy control and SERCA2b interaction of PERP

629 with 1  $\mu\text{g/ml}$  BFA in the presence and absence of 10 mM Baf. Protein levels quantified by  
630 densitometry and normalised to the level of GAPDH. Two-way ANOVA with Bonferroni post  
631 hoc test,  $n=3$ . **(C)** HCT116 cells were cultured in the presence (+) or absence (-) of serum for  
632 24 h and p62 and PERP protein levels were detected and normalised to the level of GAPDH.  
633 Blot from one independent experiment shown, performed in technical triplicate. Student's  
634 t-test,  $n=3$ , p62:  $p=0.0361^*$ , PERP:  $p=0.02^*$ . **(D)** HCT116 cells were serum starved for the  
635 indicated time points and PERP protein levels were detected by Western blot and  
636 normalised to the level of GAPDH. One-way ANOVA,  $n=5$ ,  $F=7.426$ ,  $p=0.0003^{***}$ . **(E)** HCT116  
637 cells were serum-starved for the indicated time points and apoptosis induction was  
638 measured by flow cytometry using an Alexa Fluor 647 annexin V conjugate. One-way  
639 ANOVA,  $n=4$ ,  $F=41.00$ ,  $p<0.0001^{****}$ .

640

641 **Figure 6. SERCA2b expression correlates with PERP protein stabilization and apoptosis**  
642 **induction. (A)** mCherry (24 h) or mCherry-SERCA2b were expressed in Mel202 cells and  
643 PERP protein levels were detected by Western blot. **(B)** Graph shows PERP mRNA and  
644 protein levels normalised to the level of GAPDH in Mel202 cells expressing mCherry and  
645 mCherry-SERCA2b. Student's t-test,  $n=3$ , 48 h PT  $p=0.005^{**}$ ; 72 h PT  $p=0.0017^{**}$ . **(C)** The  
646 percentage of apoptotic Mel202 cells expressing eGFP and eGFP-SERCA2b was measured at  
647 24 and 48 h post-transfection determined by flow cytometry using Alexa Fluor 647 annexin  
648 V. Student's t-test,  $n=3$ , 24 h PT:  $p=0.4924$  ns, 48 h PT:  $p=0.0048^{**}$ . **(D)** Super resolution  
649 images of HeLa BAC Venus-PERP cells expressing mCherry-SERCA2b for 24 and 48 h, scale  
650 bars 20  $\mu\text{m}$ .

651

## Autophagy control and SERCA2b interaction of PERP

652 Figure 7. **PERP increasingly interacts with SERCA2b during ER stress. (A)** HeLa BAC Venus-  
653 PERP cells co-expressing mCherry-SERCA2b were treated with 1  $\mu$ g/ml BFA for 16 h and co-  
654 localization was assessed at the mid and bottom optical section. Scale bars 20  $\mu$ m. **(B)**  
655 Enlargement of boxed areas with rainbow pseudo colour-coded distribution of Venus-PERP.  
656 Scale bars 5  $\mu$ m.

657

658 Supplementary Figure 1. **Halo-PERP plasma membrane localization and functional**  
659 **characterisation. (A)** Halo-PERP fusion protein localization was assessed in Mel202 cells  
660 using the fluorescent HaloTag TMRDirect ligand. Scale bar 20  $\mu$ m. **(B)** Protein levels of  
661 endogenous PERP and p53 in Mel202 cells expressing HaloTag (24 h) or Halo-PERP for the  
662 indicated time points. One-way ANOVA, n=3, p53: F=13.39, p=0.0001\*\*\*; PERP: F=17.12,  
663 p<0.0001\*\*\*\*. **(C)** The percentage of apoptotic Mel202 cells expressing HaloTag and Halo-  
664 PERP labelled with the R110 HaloTag fluorescent ligand 48 h post-transfection determined  
665 by flow cytometry using Alexa Fluor 647 annexin V. Student's t-test, n=3, p=0.0026\*\*.

**A**

| Protein | Experiment 1 |           | Experiment 2 |           | Experiment 3 |           |
|---------|--------------|-----------|--------------|-----------|--------------|-----------|
|         | HaloTag      | Halo-PERP | HaloTag      | Halo-PERP | HaloTag      | Halo-PERP |
| PERP    | 0            | 1,731,700 | 0            | 1,786,600 | 0            | 4,110,200 |
| SERCA2  | 0            | 643,060   | 0            | 521,280   | 0            | 384,640   |

**B**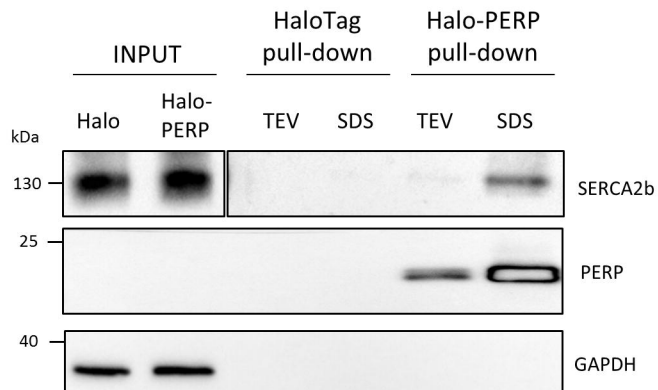**C**

IP: SERCA2  
Ab: HaloTag

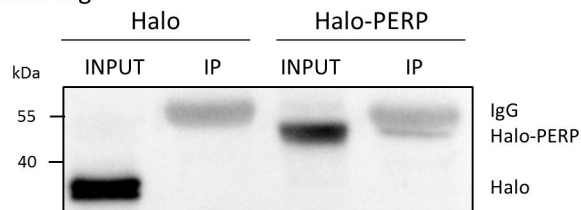**D**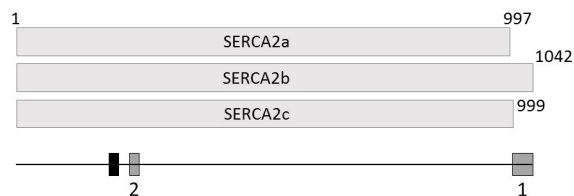**E**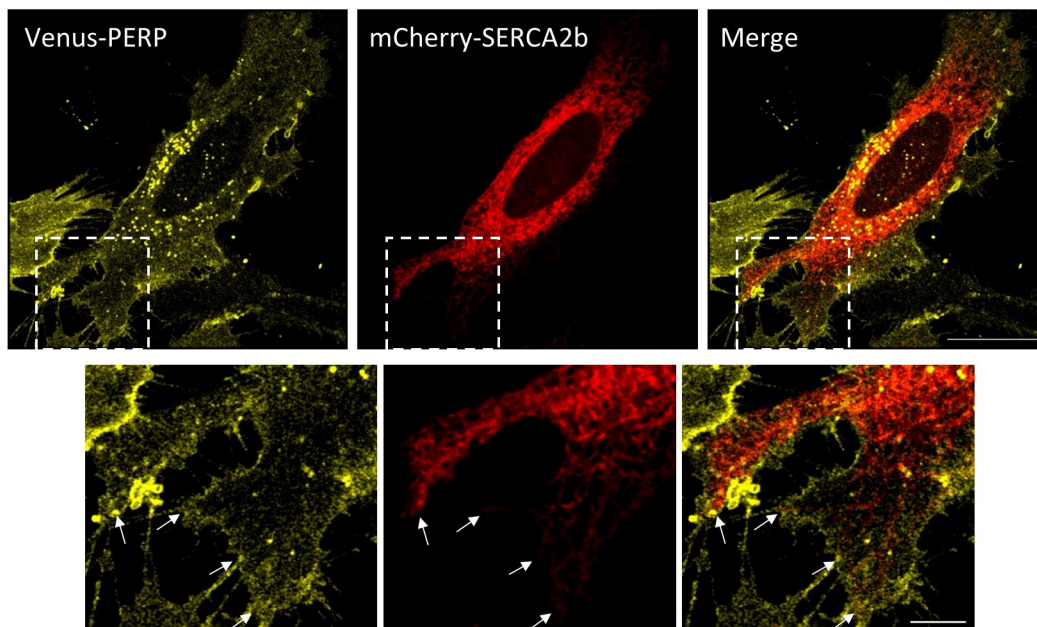



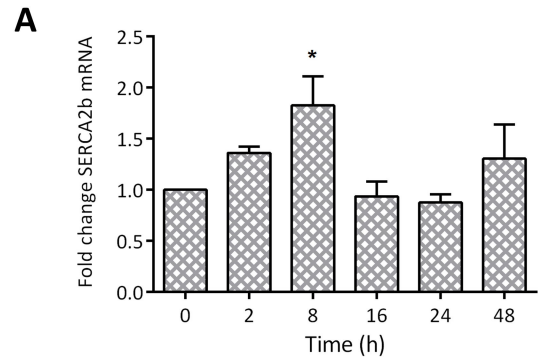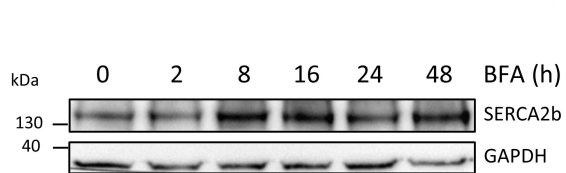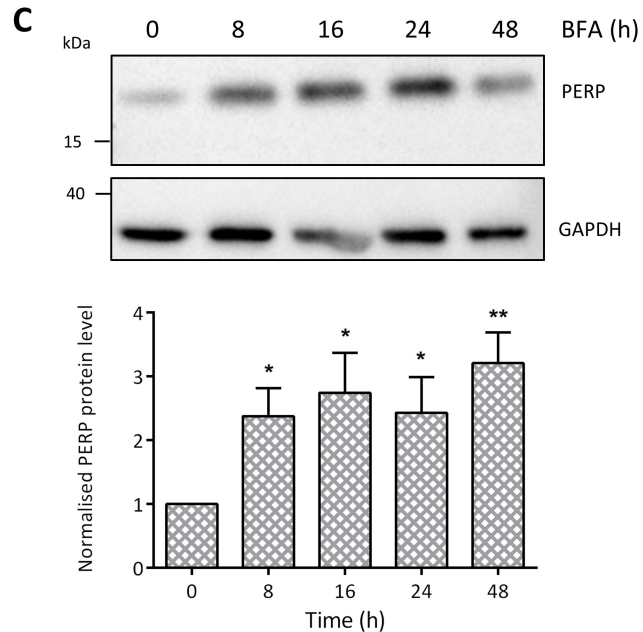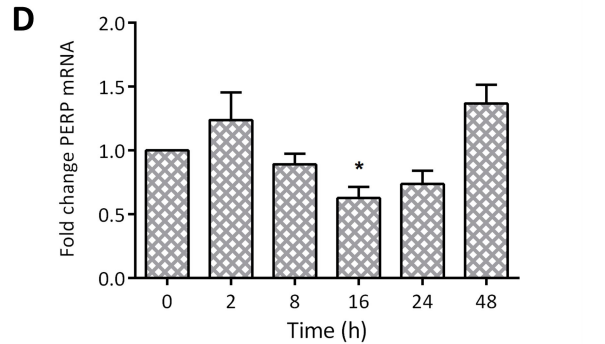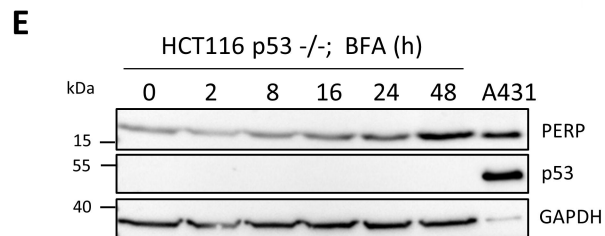

**A**

NT

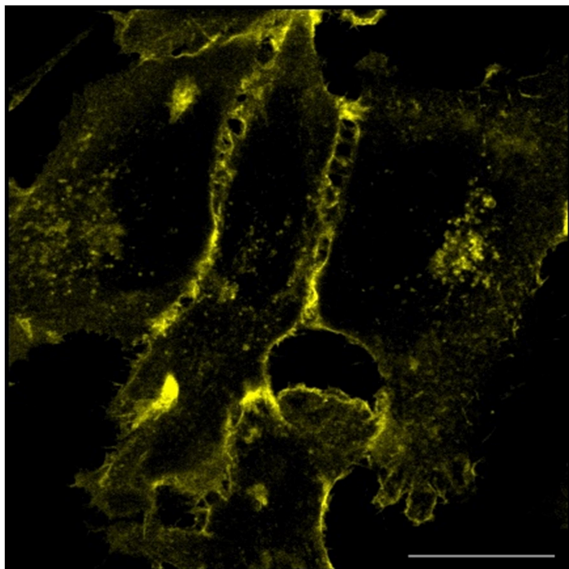

BFA

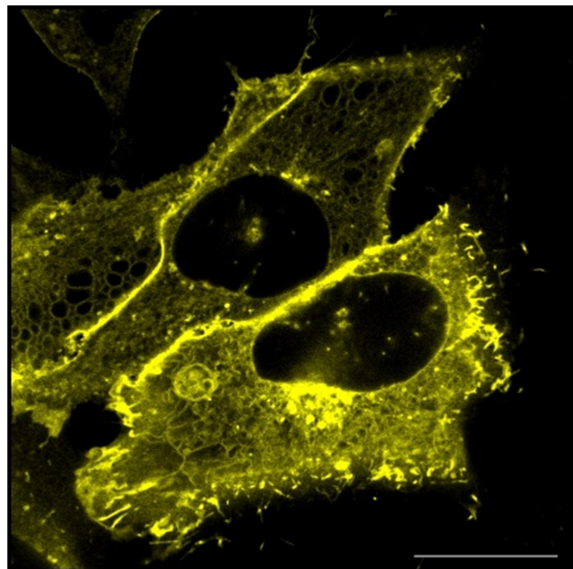**B**

NT

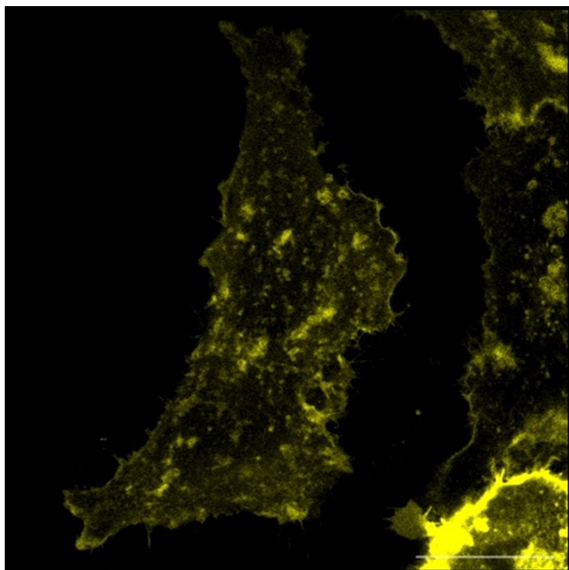

BFA

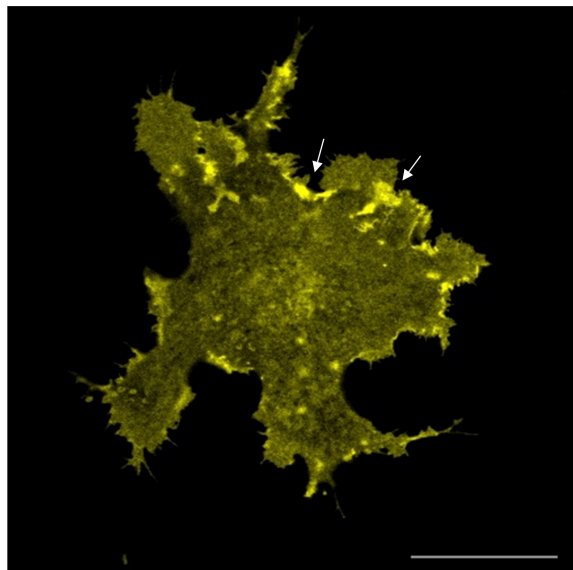

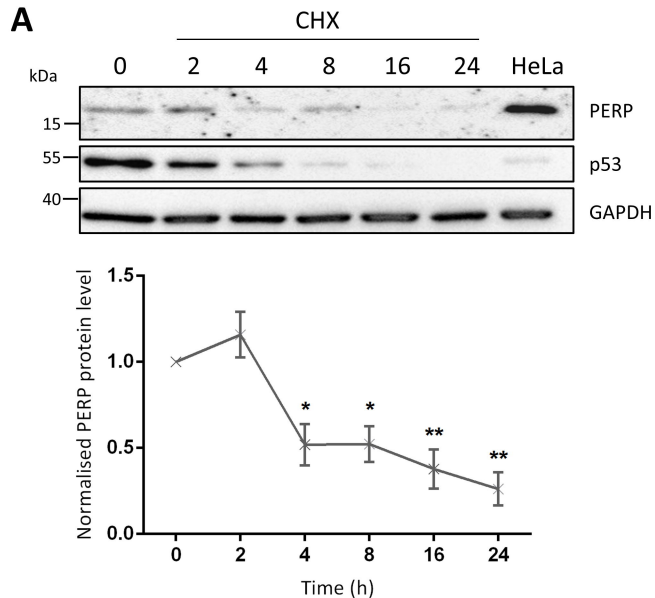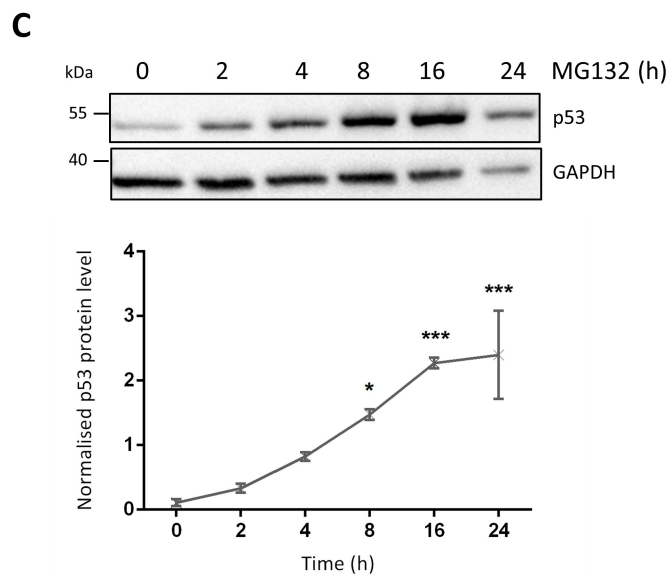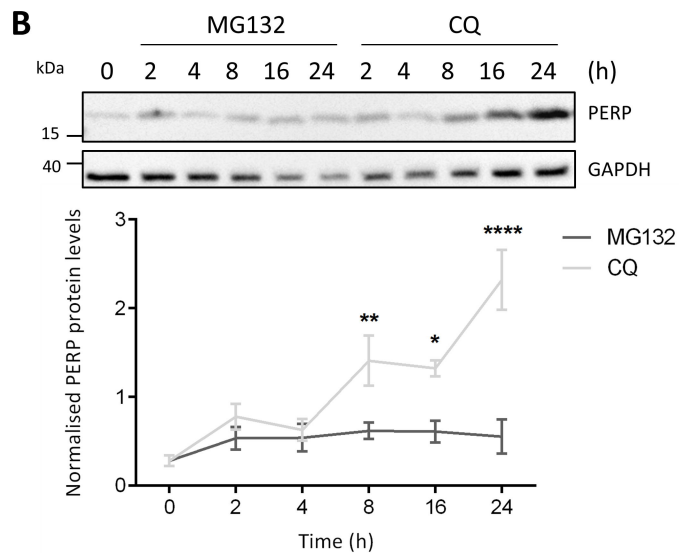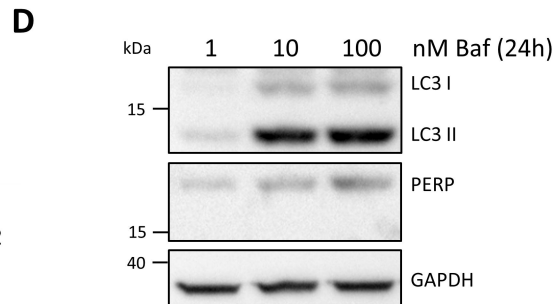

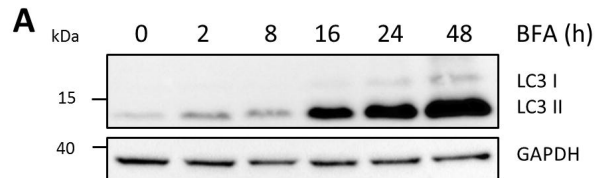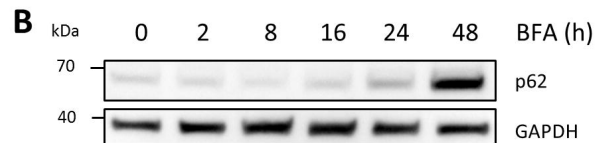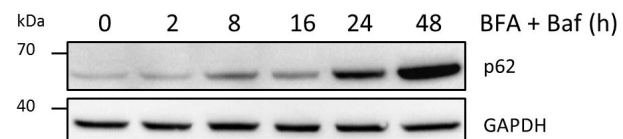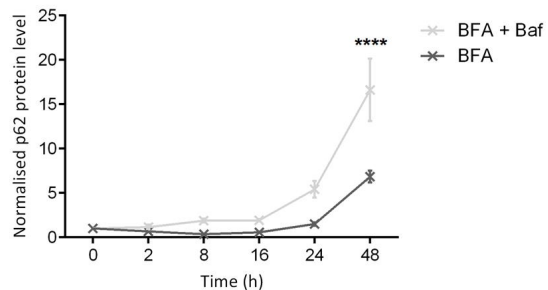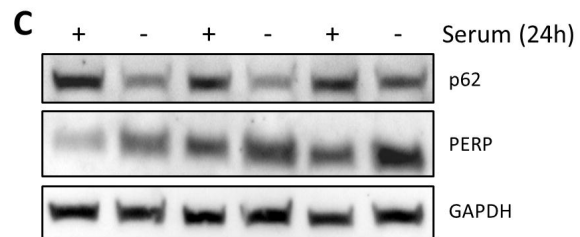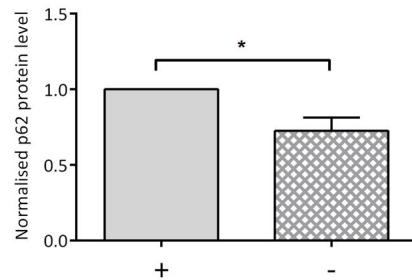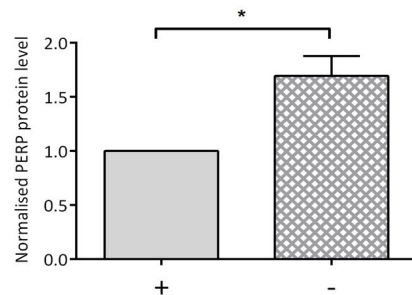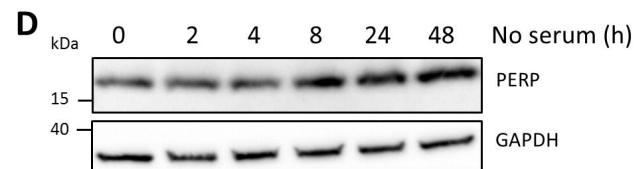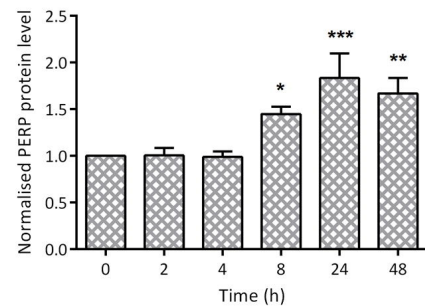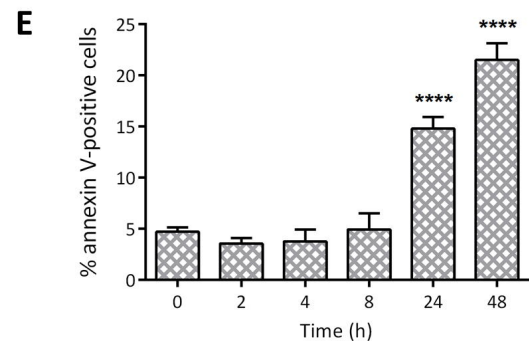

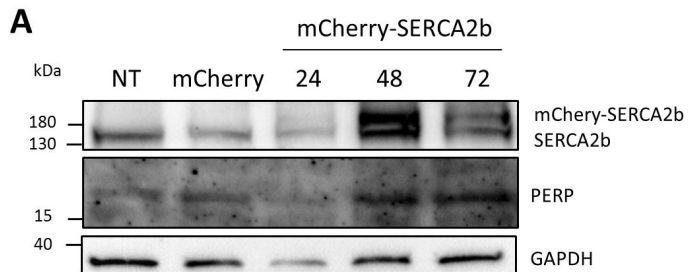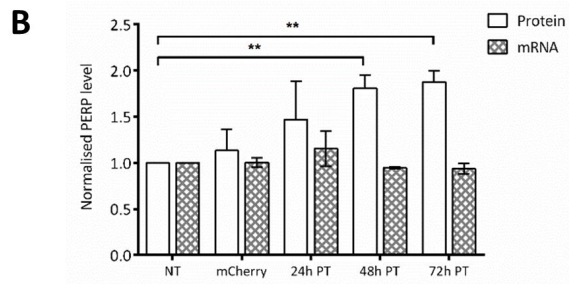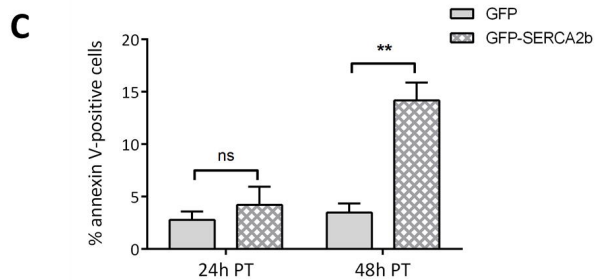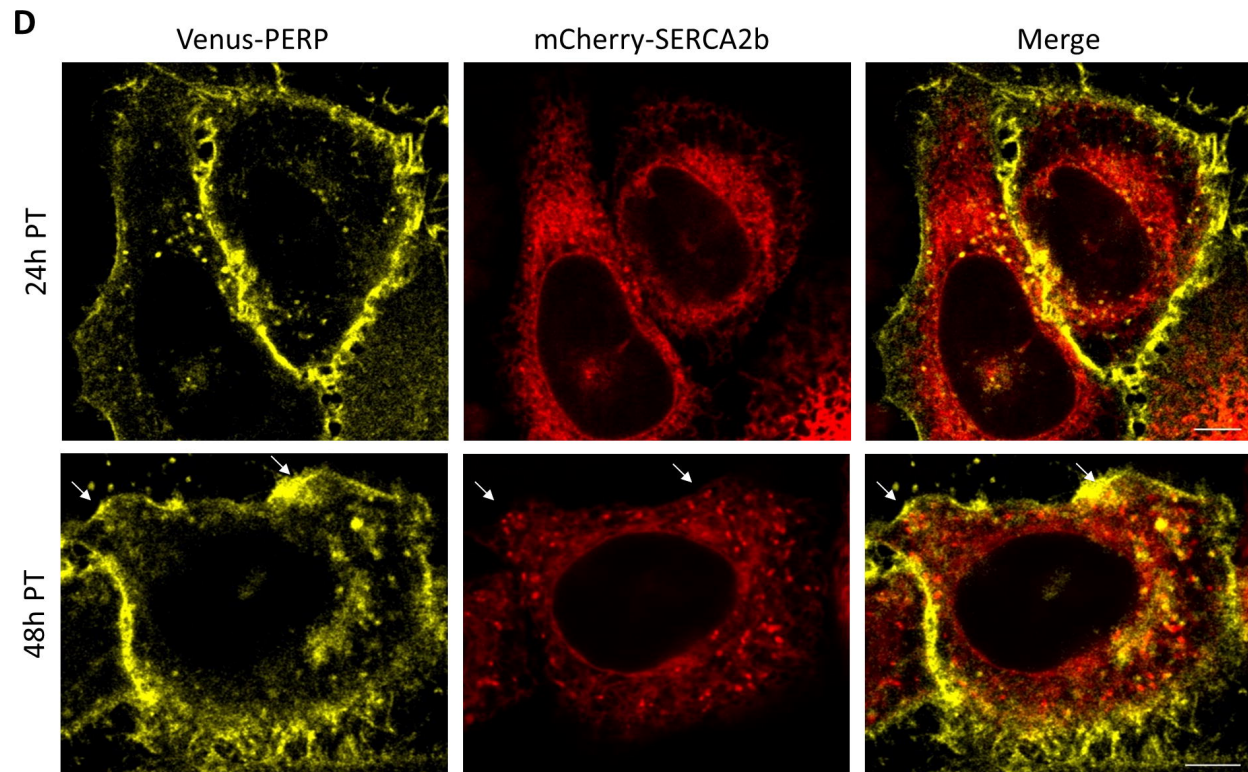

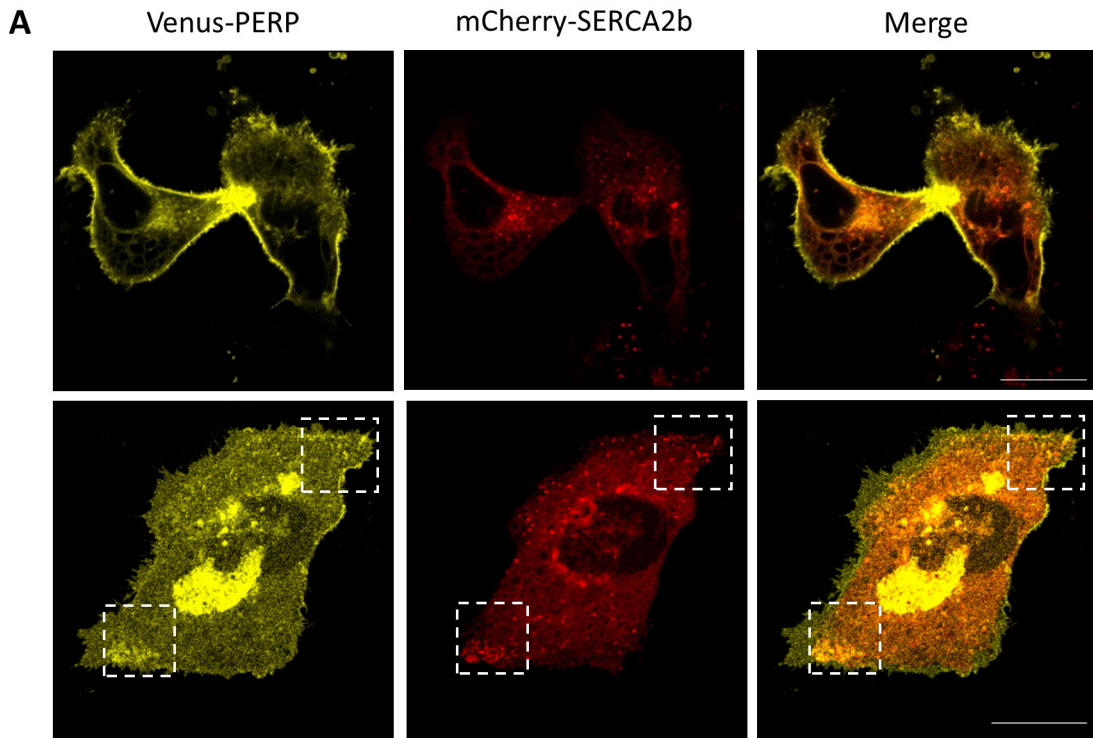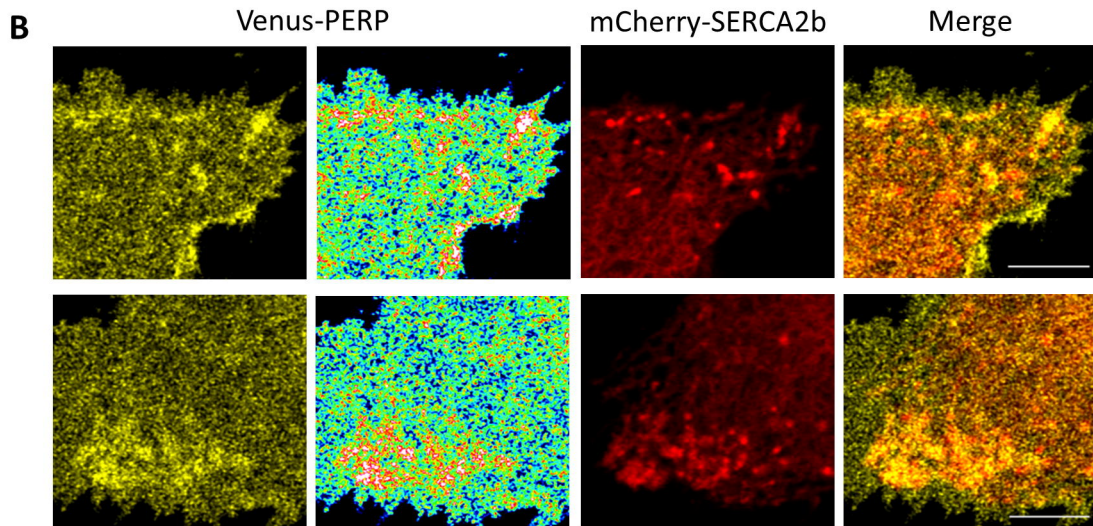

Source: https://www.biorxiv.org/content/10.1101/742882v1.full.pdf
